# Supplementary material for: Investigation of energy storage performance in organic molecule-stabilized nickel ferrocyanide nanoparticles for supercapacitor applications
Source: Royal Society of Chemistry journal article supplement (doi:10.1039/d5ma00352k), 2025-01-01
Supplement: d5ma00352k1.pdf [file d5ma00352k1.pdf]

## Supplementary Information

### Investigation of energy storage performance in organic molecule-stabilized nickel ferrocyanide nanoparticles for supercapacitor application

To determine the electrochemical parameters of the three and two electrode systems, the following equations are used:

The specific capacitance ( $S_P$ ) of the working electrode was calculated using equations (1) derived from the GCD test, respectively.

$$S_c(F/g) = I \times \Delta t / \Delta V \times m \dots (1)$$

where,  $m$  is the mass of the electroactive material;  $I$ ,  $\Delta t$  and  $\Delta V$  denotes current, discharge time and potential window, respectively.

The mass ratio of anode and cathode material was calculated using the following equation (2).

$$\frac{m_-}{m_+} = \frac{S_{P+} \times \Delta V_+}{S_{P-} \times \Delta V_-} \dots (2)$$

where,  $m_+$ ,  $S_{P+}$ ,  $\Delta V_+$  and  $m_-$ ,  $S_{P-}$ ,  $\Delta V_-$  are the masses (g), capacitance (F/g) and the voltage windows (V), of cathode and anode electrodes, respectively. The specific energy ( $S_E$ ) and specific power ( $S_P$ ) were calculated using the following equations (3 and 4).

$$S_E(Wh.kg^{-1}) = \frac{I \int V(t)dt}{m \times 3.6} \dots (3)$$

$$S_P(W.kg^{-1}) = (S_E / \Delta t) \times 3600 \dots (4)$$

where,  $I$ ,  $\int V(t)dt$ ,  $m$  and  $\Delta t$  represents the applied current, area under discharge curve, mass of active material (g) and discharge time, respectively.

**Figure: S1**

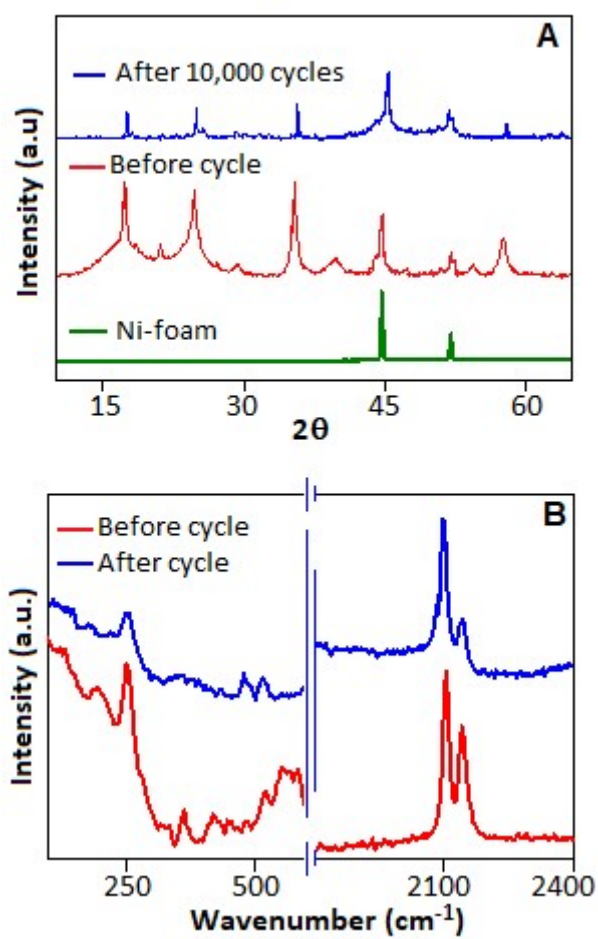

**Figure S1:** XRD (A) and Raman spectra (B) of the active electrode material (NFC) for before and after 10,000 GCD cycles.

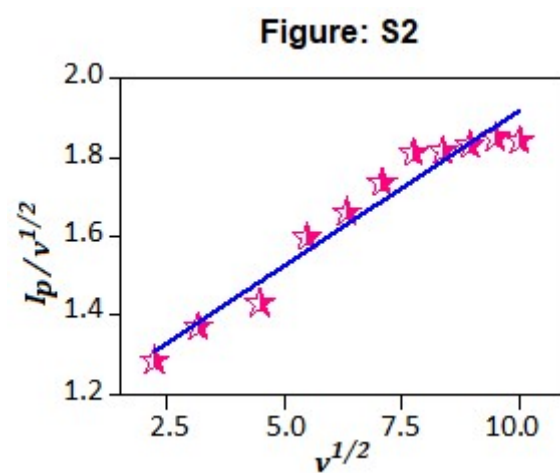

**Figure S2:** Plot of  $I_p/v^{1/2}$  as a function of  $v^{1/2}$ .
